# Supplementary material for: Indirect cost of maternal deaths in the WHO African Region in 2010
Source: PubMed Central journal article supplement (PMC4164751; doi:10.1186/1471-2393-14-299), 2014-08-31
Supplement: 12884_2014_1181_MOESM1_ESM.pdf [file 12884_2014_1181_MOESM1_ESM.pdf]

**ADDITIONAL FILE 1: DATA INPUTS.**

The file contains Table 1: Female Life Expectancy At Birth In Countries Of The Who African Region In 2011; TABLE 2: Per capita GDP, Per capita total expenditure on health, and Non-health GDP per capita, PPP (current international \$) in 2010; and Table 3: Total Maternal Mortality In 2010

| <b>TABLE 1: FEMALE LIFE EXPECTANCY AT BIRTH IN COUNTRIES OF THE WHO AFRICAN REGION IN 2010</b> |                        |
|------------------------------------------------------------------------------------------------|------------------------|
| <b>Country</b>                                                                                 | <b>Life expectancy</b> |
| Algeria                                                                                        | 74                     |
| Angola                                                                                         | 53                     |
| Benin                                                                                          | 59                     |
| Botswana                                                                                       | 67                     |
| Burkina Faso                                                                                   | 57                     |
| Burundi                                                                                        | 54                     |
| Cameroon                                                                                       | 54                     |
| Cape Verde                                                                                     | 76                     |
| Central African Republic                                                                       | 50                     |
| Chad                                                                                           | 53                     |
| Comoros                                                                                        | 63                     |
| Congo                                                                                          | 59                     |
| Côte d'Ivoire                                                                                  | 58                     |
| Dem. Rep. of the Congo                                                                         | 51                     |
| Equatorial Guinea                                                                              | 55                     |
| Eritrea                                                                                        | 64                     |
| Ethiopia                                                                                       | 62                     |
| Gabon                                                                                          | 64                     |
| Gambia                                                                                         | 60                     |
| Ghana                                                                                          | 65                     |
| Guinea                                                                                         | 56                     |
| Guinea-Bissau                                                                                  | 52                     |
| Kenya                                                                                          | 61                     |
| Lesotho                                                                                        | 50                     |
| Liberia                                                                                        | 60                     |
| Madagascar                                                                                     | 68                     |
| Malawi                                                                                         | 58                     |
| Mali                                                                                           | 53                     |
| Mauritania                                                                                     | 60                     |
| Mauritius                                                                                      | 78                     |
| Mozambique                                                                                     | 53                     |
| Namibia                                                                                        | 66                     |
| Niger                                                                                          | 57                     |

|                             |    |
|-----------------------------|----|
| Nigeria                     | 54 |
| Rwanda                      | 61 |
| Sao Tome and Principe       | 65 |
| Senegal                     | 62 |
| Seychelles                  | 78 |
| Sierra Leone                | 47 |
| South Africa                | 60 |
| Swaziland                   | 51 |
| Togo                        | 58 |
| Uganda                      | 57 |
| United Republic of Tanzania | 61 |
| Zambia                      | 56 |
| Zimbabwe                    | 55 |

Source: WHO [22]

| <b>TABLE 2: Per capita GDP, Per capita total expenditure on health, and Non-health GDP per capita, PPP (current international \$) in 2010</b> |                                    |                                                                           |                                          |
|-----------------------------------------------------------------------------------------------------------------------------------------------|------------------------------------|---------------------------------------------------------------------------|------------------------------------------|
| <b>Country</b>                                                                                                                                | <b>(A) Per capita GDP (Int\$)*</b> | <b>(B) Per capita total expenditure on health (PPP int. \$) in 2010**</b> | <b>(C=A-B) Non-Health PCPGDP (Int\$)</b> |
| Algeria                                                                                                                                       | 7,975.80                           | 364.28                                                                    | 7,611.52                                 |
| Angola                                                                                                                                        | 5,554.07                           | 194.05                                                                    | 5,360.02                                 |
| Benin                                                                                                                                         | 1,453.70                           | 69.82                                                                     | 1,383.88                                 |
| Botswana                                                                                                                                      | 14,290.18                          | 711.50                                                                    | 13,578.68                                |
| Burkina Faso                                                                                                                                  | 1,325.23                           | 91.99                                                                     | 1,233.24                                 |
| Burundi                                                                                                                                       | 523.03                             | 54.26                                                                     | 468.77                                   |
| Cameroon                                                                                                                                      | 2,153.39                           | 122.16                                                                    | 2,031.23                                 |
| Cape Verde                                                                                                                                    | 4,421.81                           | 167.37                                                                    | 4,254.44                                 |
| Central African Republic                                                                                                                      | 958.79                             | 29.88                                                                     | 928.91                                   |
| Chad                                                                                                                                          | 2,005.57                           | 59.78                                                                     | 1,945.79                                 |
| Comoros                                                                                                                                       | 1,163.72                           | 57.92                                                                     | 1,105.80                                 |

|                               |           |          |           |
|-------------------------------|-----------|----------|-----------|
| Congo, Democratic Republic of | 369.32    | 26.26    | 343.06    |
| Congo, Republic of            | 4,123.90  | 96.91    | 4,026.99  |
| Côte d'Ivoire                 | 1,937.90  | 114.67   | 1,823.23  |
| Equatorial Guinea             | 28,186.96 | 1,395.46 | 26,791.50 |
| Eritrea                       | 493.01    | 17.14    | 475.87    |
| Ethiopia                      | 967.15    | 50.04    | 917.11    |
| Gabon                         | 14,094.77 | 531.80   | 13,562.97 |
| Gambia, The                   | 1,940.56  | 89.89    | 1,850.67  |
| Ghana                         | 1,635.28  | 85.25    | 1,550.03  |
| Guinea                        | 987.94    | 67.32    | 920.62    |
| Guinea-Bissau                 | 1,138.68  | 81.86    | 1,056.82  |
| Kenya                         | 1,618.53  | 72.10    | 1,546.43  |
| Lesotho                       | 1,762.61  | 183.78   | 1,578.83  |
| Liberia                       | 541.93    | 88.04    | 453.89    |
| Madagascar                    | 934.22    | 34.55    | 899.67    |
| Malawi                        | 723.65    | 74.10    | 649.55    |
| Mali                          | 1,204.88  | 69.11    | 1,135.77  |
| Mauritania                    | 2,321.69  | 137.93   | 2,183.76  |
| Mauritius                     | 13,509.28 | 835.46   | 12,673.82 |
| Mozambique                    | 885.74    | 57.30    | 828.44    |
| Namibia                       | 6,702.61  | 360.00   | 6,342.61  |
| Niger                         | 705.85    | 36.00    | 669.85    |
| Nigeria                       | 2,387.56  | 128.00   | 2,259.56  |
| Rwanda                        |           | 120.49   | 1,041.20  |

|                       |           |        |           |
|-----------------------|-----------|--------|-----------|
|                       | 1,161.69  |        |           |
| São Tomé and Príncipe | 1,698.38  | 150.64 | 1,547.74  |
| Senegal               | 1,845.76  | 111.15 | 1,734.61  |
| Seychelles            | 22,708.71 | 805.63 | 21,903.08 |
| Sierra Leone          | 1,096.43  | 171.30 | 925.13    |
| South Africa          | 10,470.26 | 914.52 | 9,555.74  |
| Swaziland             | 5,195.10  | 410.69 | 4,784.41  |
| Tanzania              | 1,417.65  | 100.19 | 1,317.46  |
| Togo                  | 948.44    | 74.00  | 874.44    |
| Uganda                | 1,243.03  | 117.02 | 1,126.01  |
| Zambia                | 1,507.83  | 91.67  | 1,416.16  |
| Zimbabwe              | 435.57    | 56.00  | 379.57    |

Sources: \*The World Bank [21]; \*\*World Health Organization [4]

| TABLE 3: TOTAL MATERNAL MORTALITY IN 2010 |                           |
|-------------------------------------------|---------------------------|
| Country                                   | Number of maternal deaths |
| Algeria                                   | 690                       |
| Angola                                    | 3,600                     |
| Benin                                     | 1,200                     |
| Botswana                                  | 75                        |
| Burkina Faso                              | 2,100                     |
| Burundi                                   | 2,200                     |
| Cameroon                                  | 4,900                     |
| Cape Verde Is                             | 8                         |
| Central African Rep                       | 1,400                     |
| Chad                                      | 5,300                     |
| Comoros                                   | 79                        |
| Congo                                     | 800                       |
| Cote d'Ivoire                             | 2,700                     |
| DRC                                       | 15,000                    |
| Equatorial Guinea                         | 61                        |

|                      |        |
|----------------------|--------|
| Eritrea              | 460    |
| Ethiopia             | 9,000  |
| Gabon                | 94     |
| Gambia The           | 230    |
| Ghana                | 2,700  |
| Guinea               | 2,400  |
| Guinea Bissau        | 460    |
| Kenya                | 5,500  |
| Lesotho              | 370    |
| Liberia              | 1,200  |
| Madagascar           | 1,800  |
| Malawi               | 3,000  |
| Mali                 | 3,800  |
| Mauritania           | 590    |
| Mauritius            | 10     |
| Mozambique           | 4,300  |
| Namibia              | 120    |
| Niger                | 4,500  |
| Nigeria              | 40,000 |
| Reunion              |        |
| Rwanda               | 1,500  |
| Sao Tome et Principe | 4      |
| Senegal              | 1,700  |
| Seychelles           |        |
| Sierra Leone         | 2,000  |
| South Africa         | 3,200  |
| Swaziland            | 110    |
| Tanzania Uni Rep     | 8,500  |
| Togo                 | 580    |
| Uganda               | 4,700  |
| Zambia               | 2,600  |
| Zimbabwe             | 2,200  |

Source: WHO, UNICEF, UNFPA and The World Bank [2]
